# Supplementary figures and images for: Development and Validation of a Dynamic Prediction Model for Massive Hemorrhage in Trauma
Source: Hindawi journal article supplement (doi:10.1155/2022/9438159), 2022-11-30

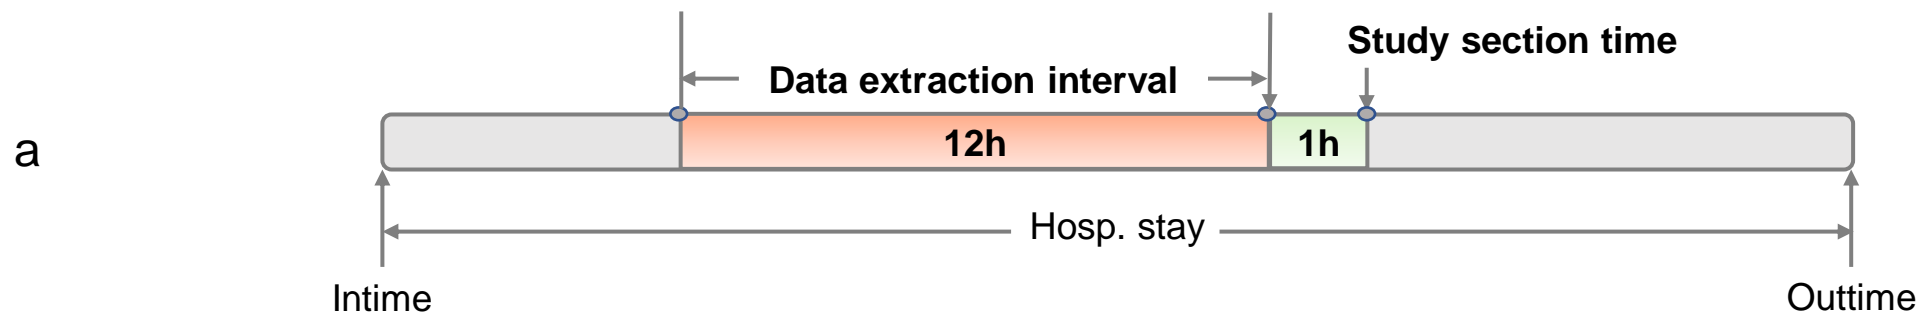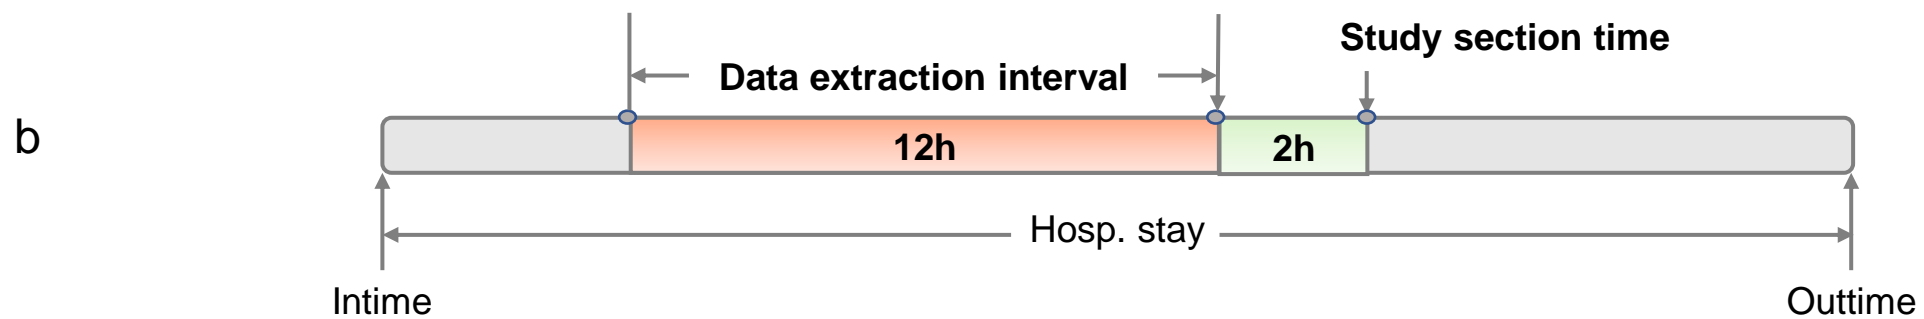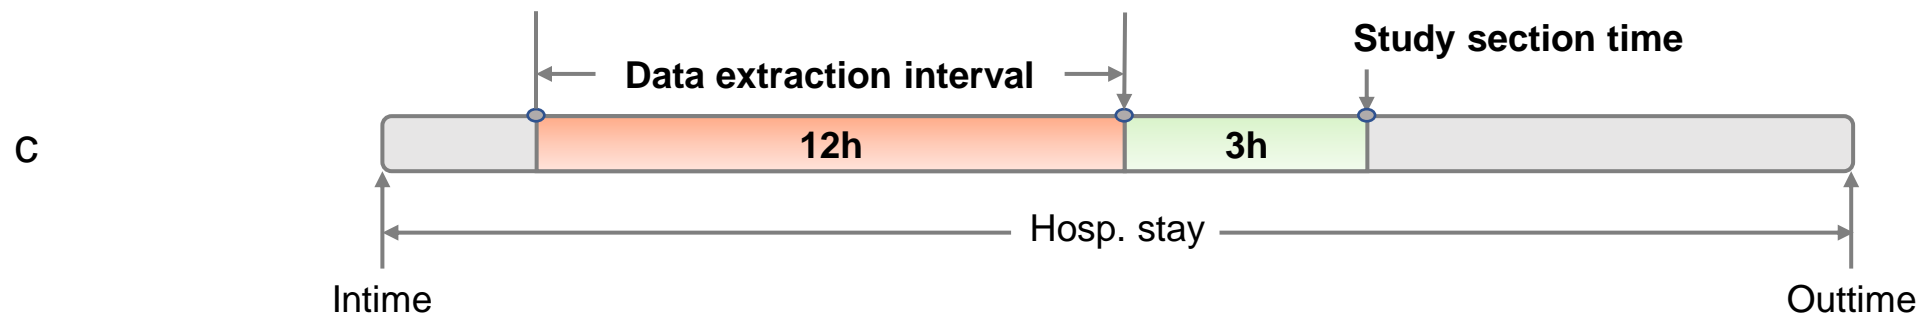

Supplement: f1 [file 9438159.f1.zip]
